# Supplementary material for: Impact of In Vitro Long-Term Low-Level DEHP Exposure on Gene Expression Profile in Human Granulosa Cells
Source: MDPI journal article supplement (doi:10.3390/cells11152304), 2022-07-27
Supplement: s1 [file s1]

## **SUPPLEMENTARY MATERIAL**

### **Impact of *In Vitro* Long-Term Low-Level DEHP Exposure on Gene Expression Profile in Human Granulosa Cells**

Dragana Samardzija Nenadov<sup>1</sup>, Kristina Pogrmic-Majkic<sup>1\*</sup>, Biljana Tesic<sup>1</sup>, Dunja Kokai<sup>1</sup>, Svetlana Fa  
Nedeljkovic<sup>1</sup>, Bojana Stanic<sup>1</sup> and Nebojsa Andric<sup>1</sup>

<sup>1</sup>University of Novi Sad, Faculty of Sciences, Department of Biology and Ecology, Serbia

\*Corresponding author:

Kristina Pogrmic-Majkic, Ph.D.

University of Novi Sad, Faculty of Sciences, Department of Biology and Ecology

Trg Dositeja Obradovica 2, 21000 Novi Sad, Serbia

phone: +381 21 485 2675, fax: +381 21 450 620

email: [kristina.pogrmic@dbe.uns.ac.rs](mailto:kristina.pogrmic@dbe.uns.ac.rs)

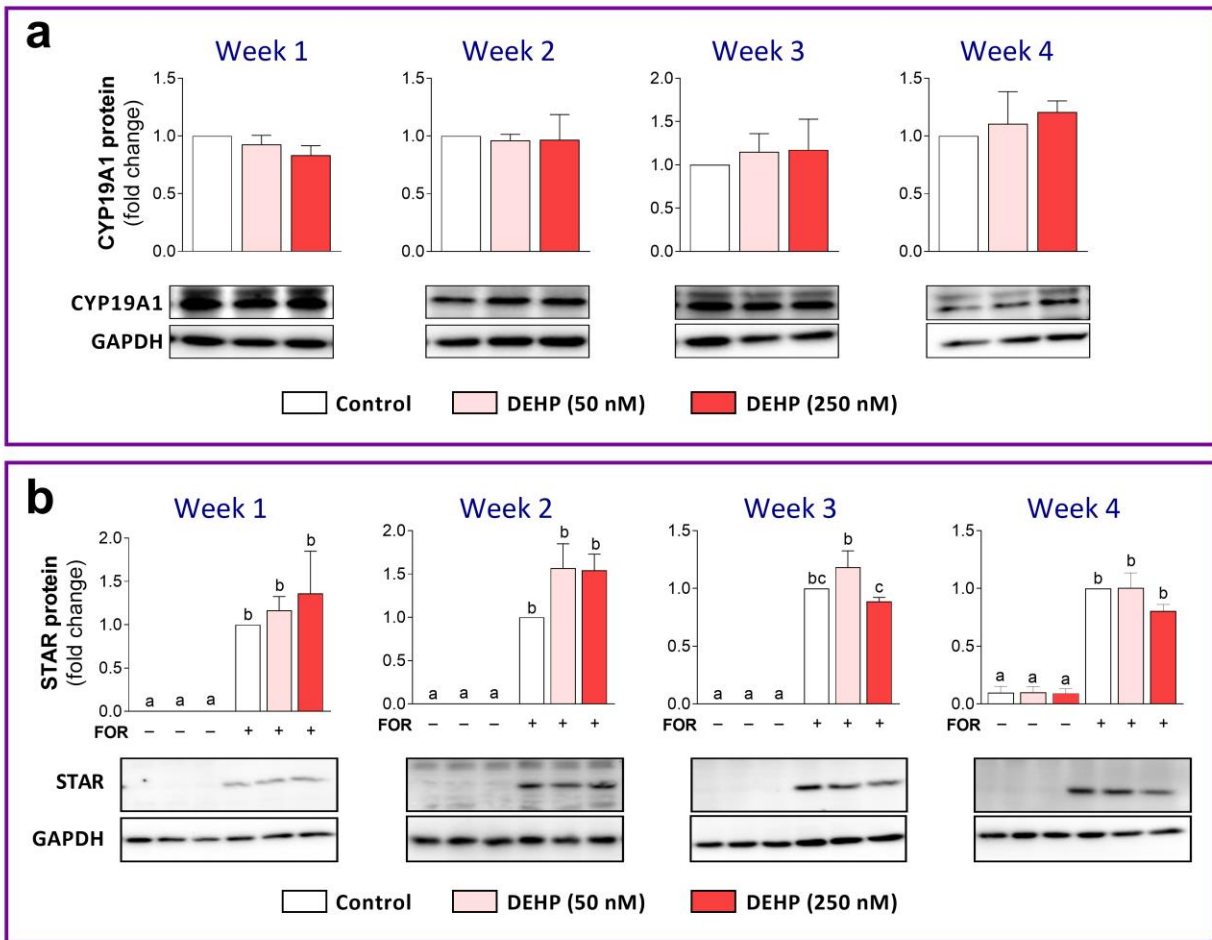

**Figure S1. CYP19A1 and STAR protein expression HGrC1 cells after the long-term repeated exposure to DEHP.** Western blot analysis was used to analyze (a) CYP19A1 and (b) STAR protein expression after 1, 2, 3, and 4 weeks of the repeated exposure to DEHP50 and DEHP250 under the (a) basal and (b) FOR-stimulated conditions. Representative Western blot images are shown. Results are expressed relative to the vehicle-treated control that was set as 1 in each week. Each data point represents the mean  $\pm$  SEM of 2-3 independent experiments. Different superscript letters indicate statistically significant differences among treatment groups ( $p < 0.05$ ).

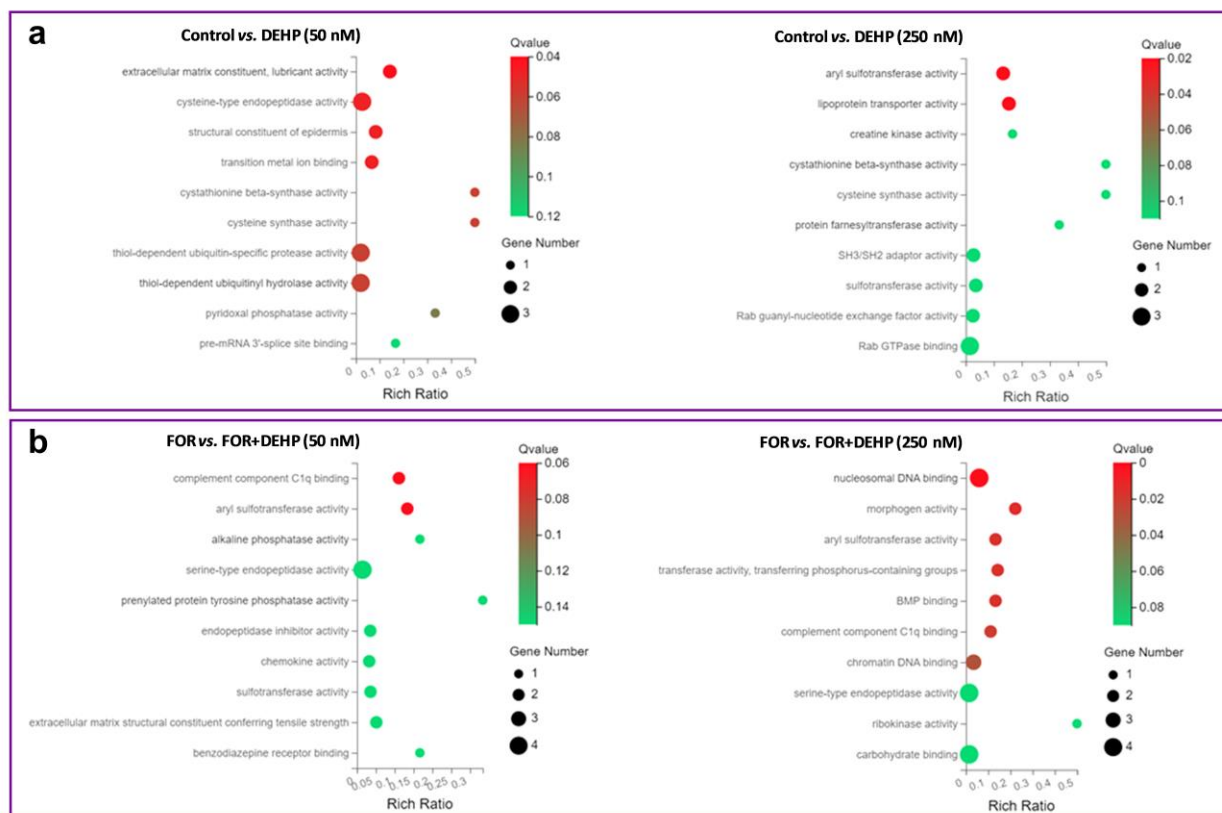

**Figure S2. Ten top-ranked molecular functions deregulated in HGrC1 cells after the long-term repeated exposure to DEHP.** Summary of deregulated molecular functions during all 4 weeks of exposure to DEHP50 and DEHP250 under the a) basal and b) FOR-stimulated conditions. A greater rich factor represents a greater degree of enrichment. A Q value represents corrected  $p$  value. Q value  $\leq 0.05$  is regarded as a significant enrichment.
